# Supplementary material for: Wage-Productivity Gap in OECD Economies
Source: publisher site journal article supplement (doi:10.5018/economics-ejournal.ja.2013-21), 2013-05-22
Supplement: Supplementary file 1 [file journalarticles_2013-21-sm2.pdf]

The paper provides an interesting result about factors associated with the gap between wages and marginal product of labor in manufacturing sectors of OECD economies. The question that the paper asks and the empirical results highlighting the answer of this question are definitely interesting.

One particular comment I have for the paper is as follows: The authors might provide a short review (about a paragraph or so) on the development of productivity and wages across the OECD economies in the time period they analyze. A figure where there is time on the x-axis and the average MPL/w ratio (for the 31 economies they analyze) on the y-axis might be very helpful here.
